# Supplementary material for: Nutritional Immunity, Zinc Sufficiency, and COVID-19 Mortality in Socially Similar European Populations
Source: PubMed Central journal article supplement (PMC8484327; doi:10.3389/fimmu.2021.699389), 2021-09-17
Supplement: Image_2.pdf [file Image_2.pdf]

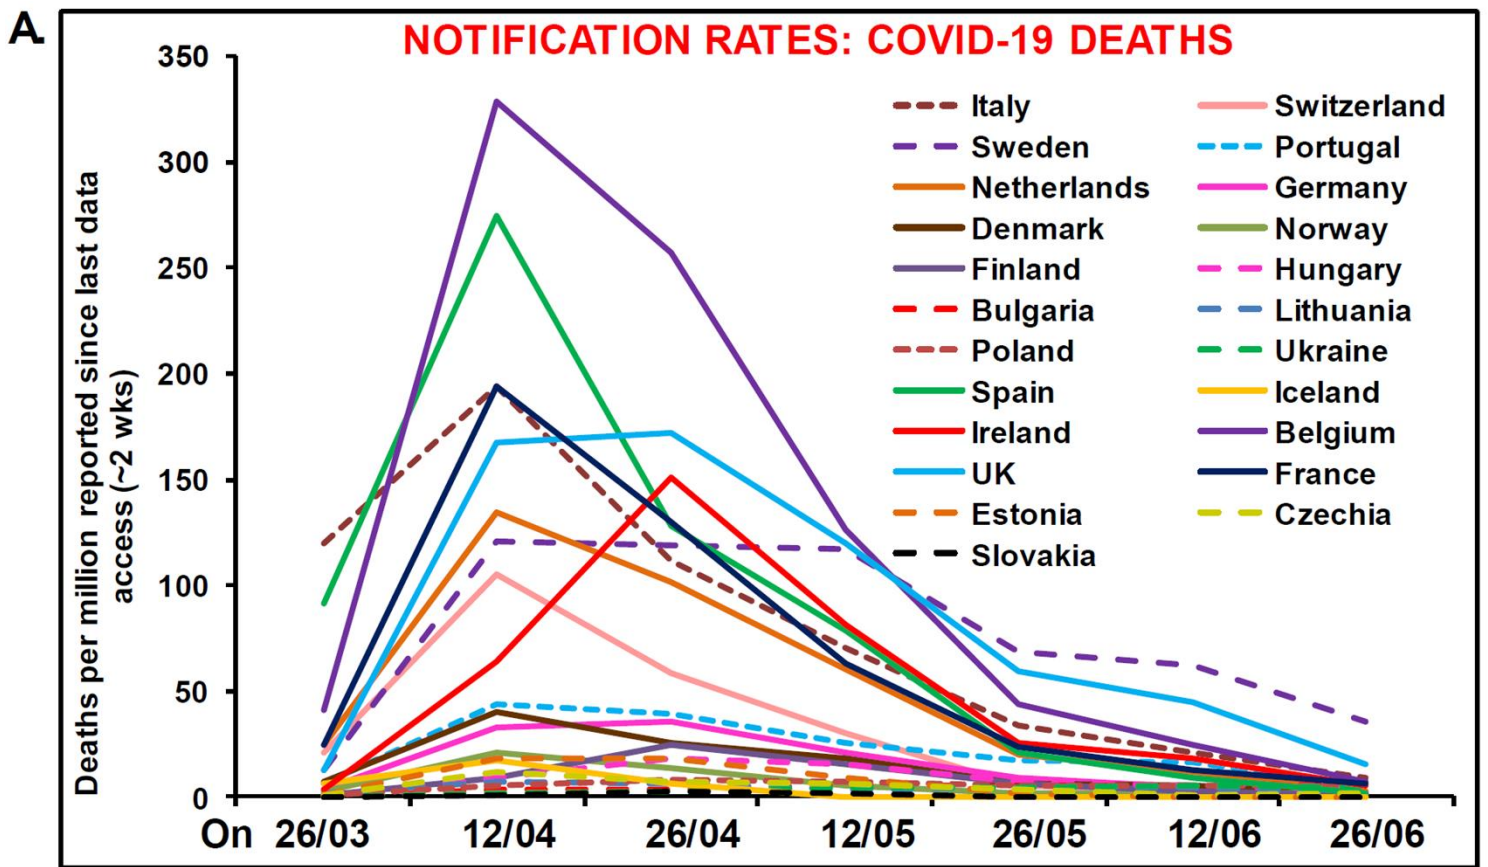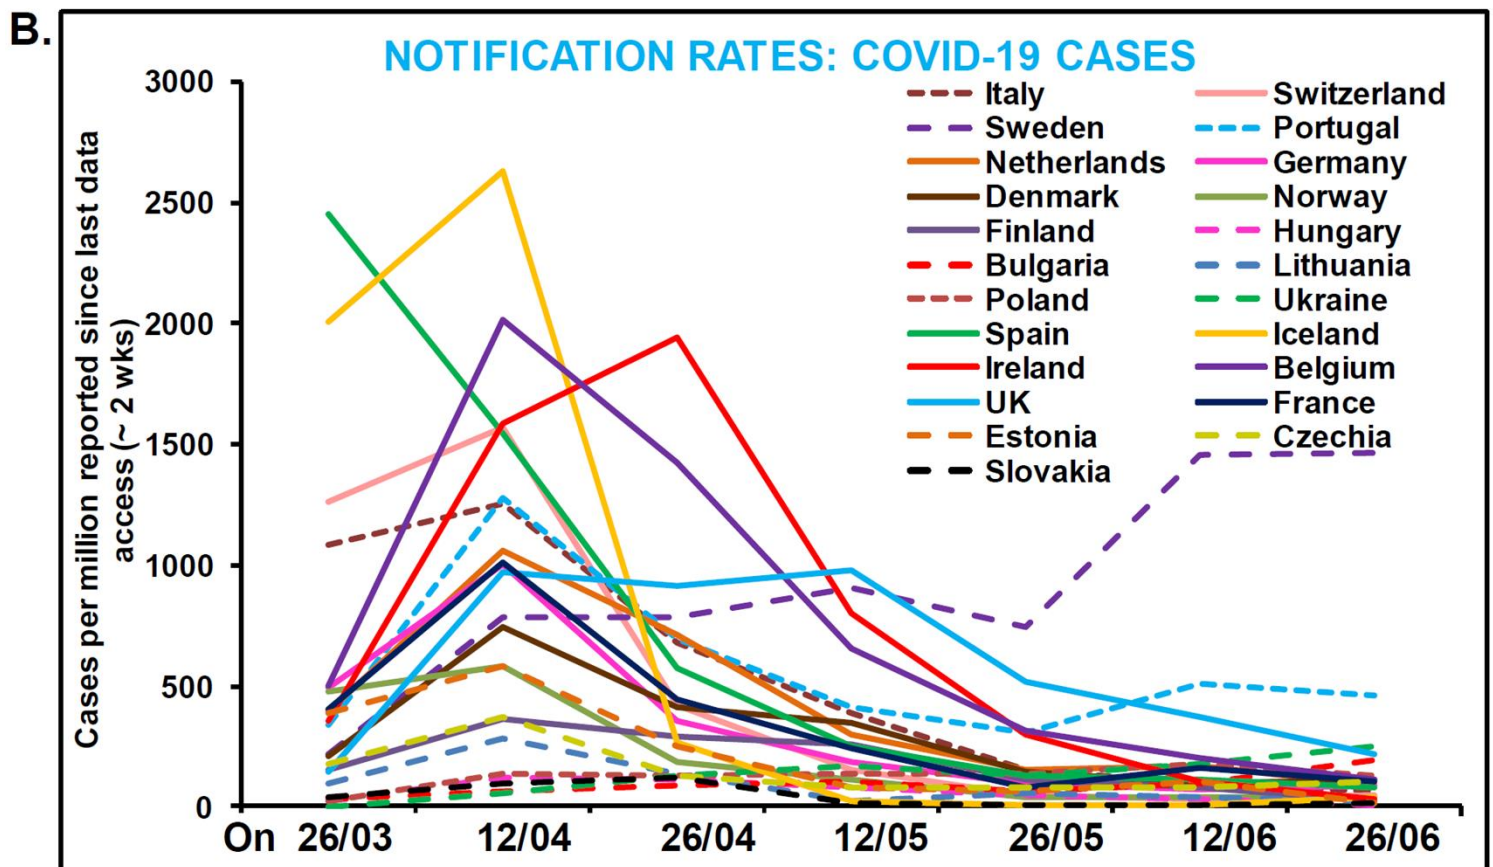

**Supplementary Figure 2.** The wave of COVID-19 deaths (8 out of 10 were elderly) (**A**) and incidences (majority younger – without dysregulated Zn homeostasis) (**B**) as it traversed the countries analyzed in the current study
